# Supplementary material for: Construction of a SnSe/SnSe 2 heterojunction for superior photoelectrochemical photodetectors
Source: Royal Society of Chemistry journal article supplement (doi:10.1039/d5tc00508f), 2025-01-01
Supplement: d5tc00508f1.pdf [file d5tc00508f1.pdf]

## Supporting Information

### Construction of SnSe/SnSe<sub>2</sub> Heterojunction for superior Photoelectrochemical Photodetectors

Yi Chen<sup>\*a</sup>, Jie Huang<sup>a</sup>, Peng Hu<sup>\*b</sup>, Jie Sun<sup>a</sup>, Qi Li<sup>a</sup>, Zhibin Lei<sup>a</sup>, Zong-huai Liu<sup>a</sup>, and Xuexia He<sup>\*a</sup>

<sup>a</sup> Shaanxi Engineering Lab for Advanced Energy Technology, School of Materials Science and Engineering, Shaanxi Normal University, 620 West Chang 'an Street, Xi'an, Shaanxi, 710119, China.

<sup>b</sup> School of Physics, Northwest University, Xi'an 710069, China.

<sup>\*</sup>Corresponding Author:

Prof. Peng Hu, Email: hupeng@nwu.edu.cn; Tel: 86-29-88303384; Fax: 86-29-88302115.

Prof. Xuexia He, Email: xxhe@snnu.edu.cn; Tel: 86-29-815300762; Fax: 86-29-81530702.

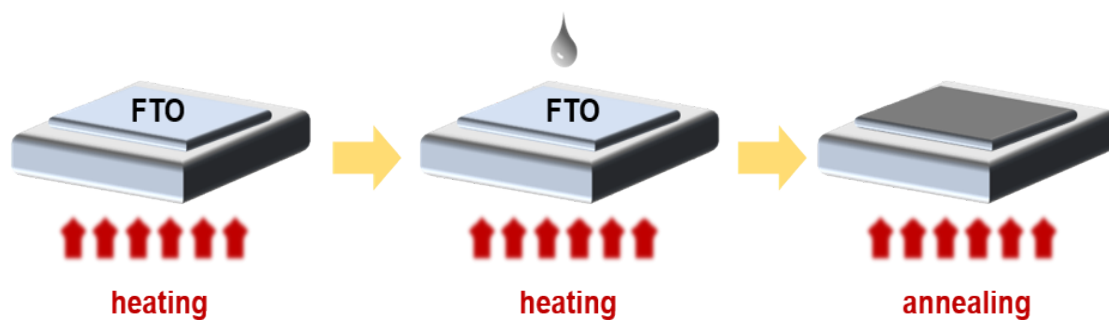

Fig. S1 Device preparation diagram

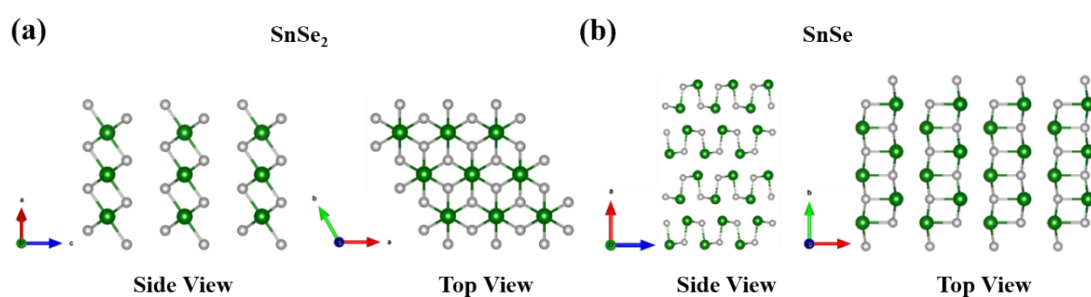

Fig. S2 (a) crystal packing of  $\text{SnSe}_2$  and (b) crystal packing of  $\text{SnSe}$

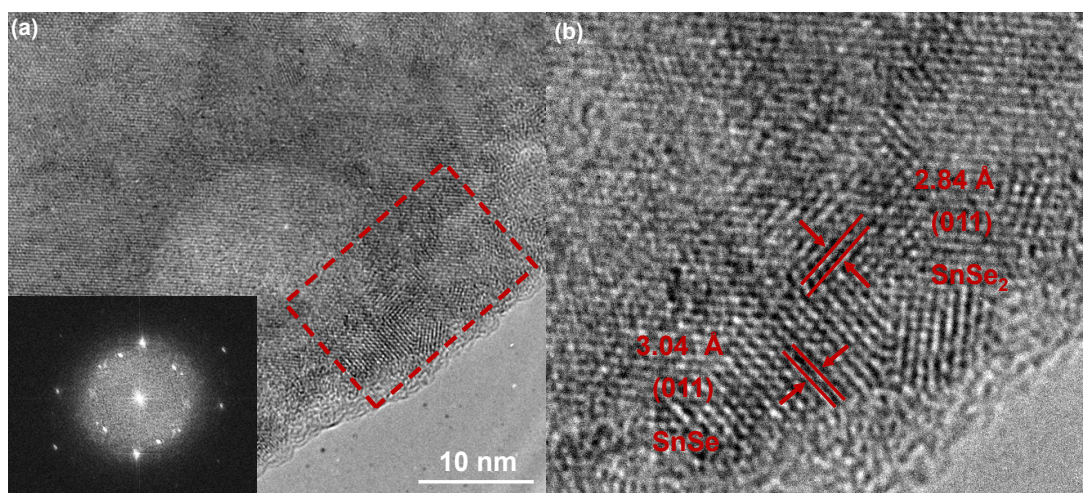

Fig. S3 HRTEM image of  $\text{SnSe}/\text{SnSe}_2$  heterojunction (a) (inset is FFT pattern) and (b) is partial enlargement of (a)

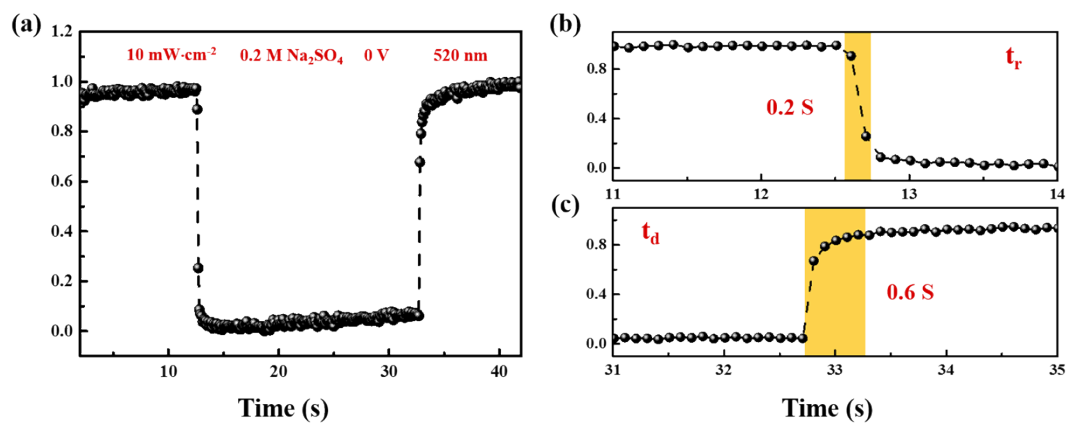

Fig. S4 Single period I-t curve of SnSe/SnSe<sub>2</sub> self-powered photodetector, (b) rise time and (c) decline time

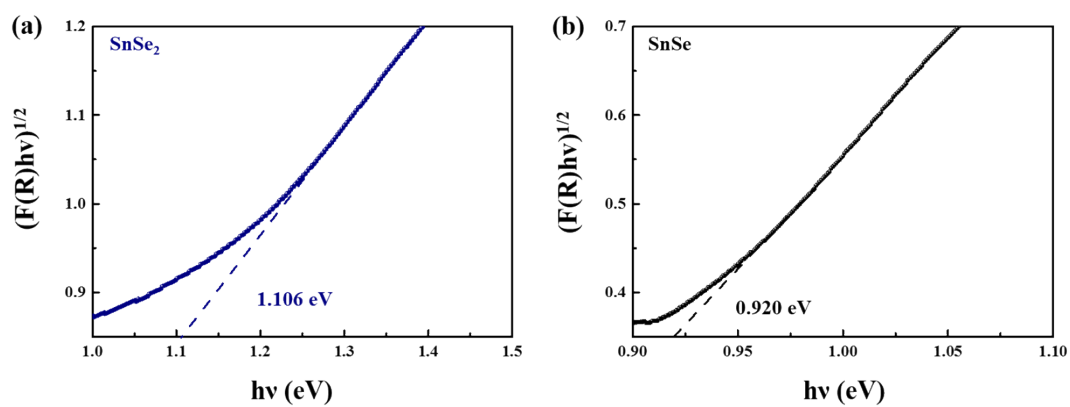

Fig S5 Optical band gap of SnSe<sub>2</sub> (a) and (b) SnSe
